# Supplementary material for: The HSP90 inhibitor onalespib potentiates 177Lu-DOTATATE therapy in neuroendocrine tumor cells
Source: PubMed Central journal article supplement — Int J Oncol. 2019 Sep 30;55(6):1287–95. doi: 10.3892/ijo.2019.4888 (PMC6831206; doi:10.3892/ijo.2019.4888), 2019-09-30

Figure S1.  $^{177}\text{Lu}$ -DOTATATE uptake following treatment with onalespib. (A) Uptake of  $^{177}\text{Lu}$ -DOTATATE in the BON and NCI-H727 cells. Cells were either untreated (black bars) or treated with 25 nM onalespib (grey bars) 24 h prior to the addition of  $^{177}\text{Lu}$ -DOTATATE. Graph displays uptake normalized to untreated (means  $\pm$  standard deviation, n=8). (B) Western blot analysis of SSTR5 in untreated spheroids or 24 h after no treatment or treatment with 25 nM onalespib, 5 kBq  $^{177}\text{Lu}$ -DOTATATE or the combination of the two. Graph displays signal normalized to untreated (means  $\pm$  standard deviation, n=4).  $^{177}\text{Lu}$ -DOT,  $^{177}\text{Lu}$ -DOTATATE; n.s., not significant.

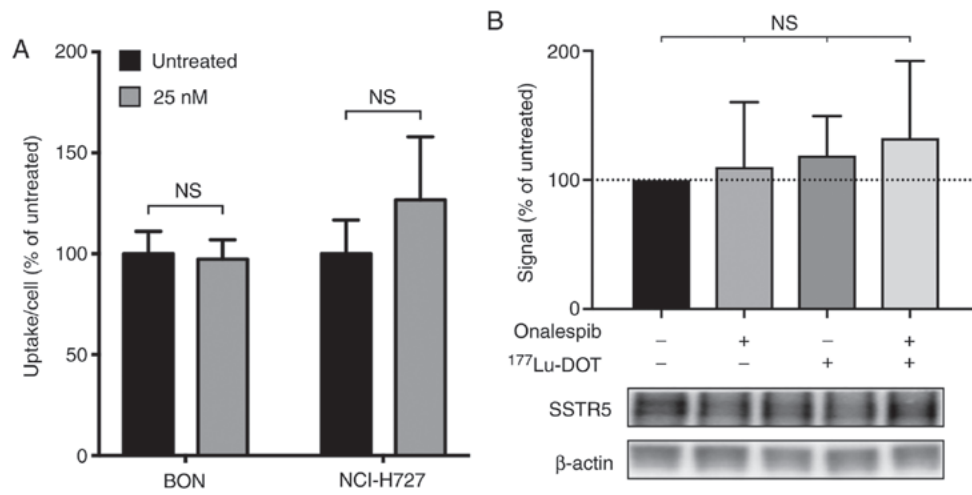

Figure S2. Spheroid size with representative spheroid images at last time point following treatment with DMSO or unlabeled DOTATATE. (A) BON cells; (B) NCI-H727 cells; (C) NCI-H460 cells. Graphs display volume (means  $\pm$  standard deviation,  $n \geq 4$ ). Scale bar, 500  $\mu\text{m}$ . DOT, DOTATATE; n.s, not significant.

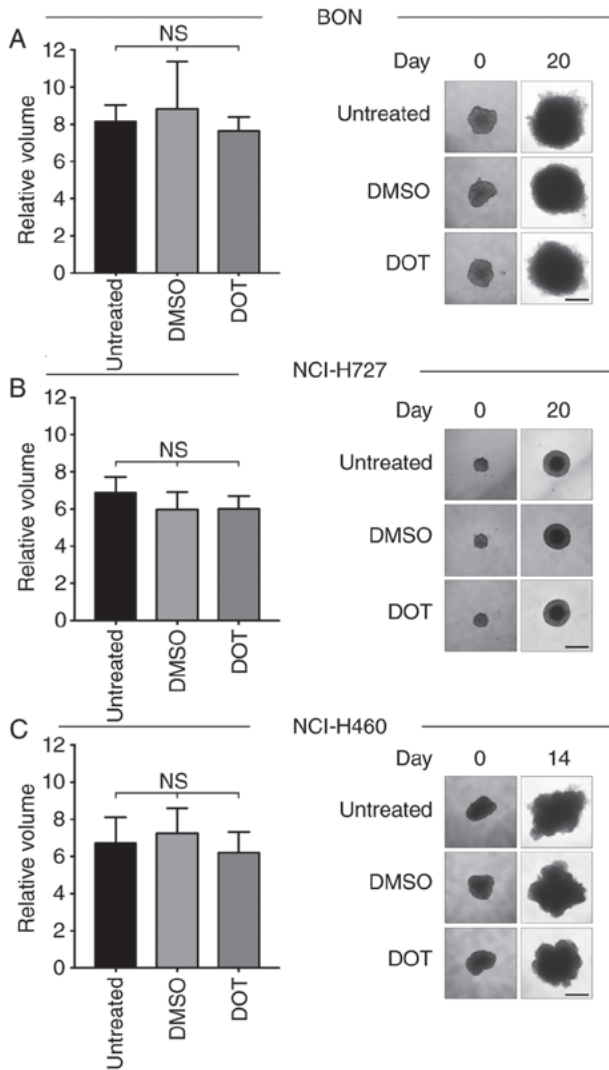

Figure S3. Combination treatments of spheroids. Spheroids were either untreated or treated with onalespib, <sup>177</sup>Lu-DOTATATE or the combination of the two. (A) BON, (B) NCI-H727 and (C) NCI-H460 cells. Spheroids were treated with a daily dose indicated in the graphs. Graphs display size normalized to untreated (means ± standard deviation, n≥4). \*P≤0.05, \*\*P≤0.01, \*\*\*P≤0.001 and \*\*\*\*P≤0.0001; n.s, not significant.

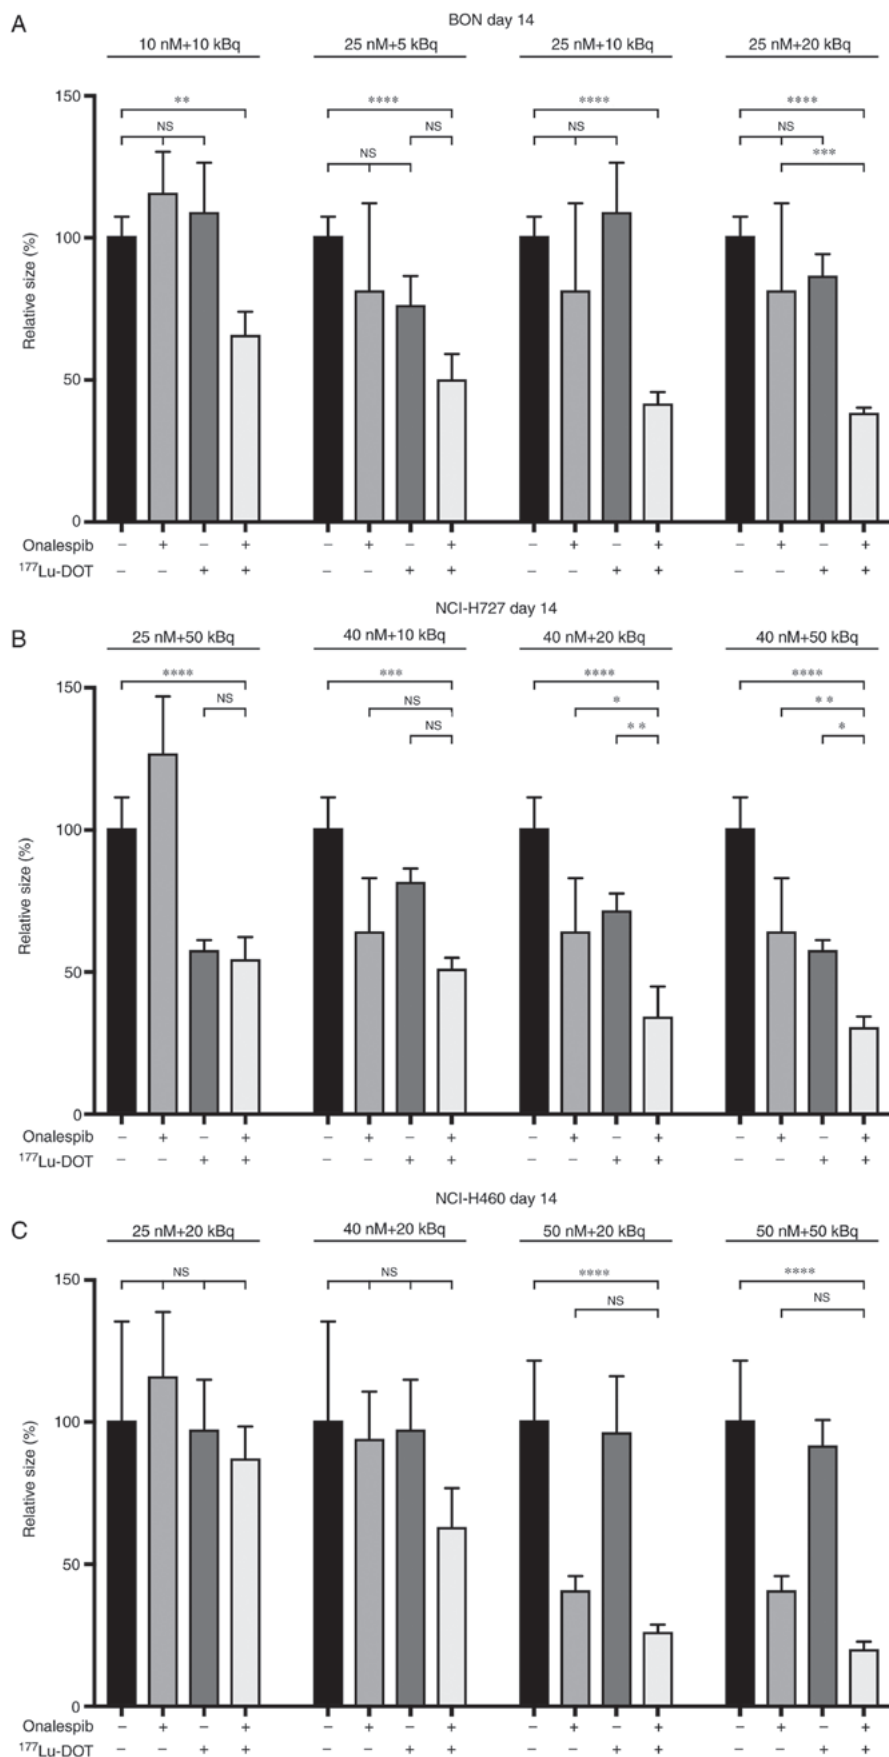

Figure S4. Representative images of flow cytometric analysis of caspase 3 and 7 activity in BON spheroids. Live/dead staining (y-axis) and caspase activity (x-axis) of untreated control (A), 25 nM onalespib (B), 5 kBq <sup>177</sup>Lu-DOTATATE (C) and combination treated spheroids (D).

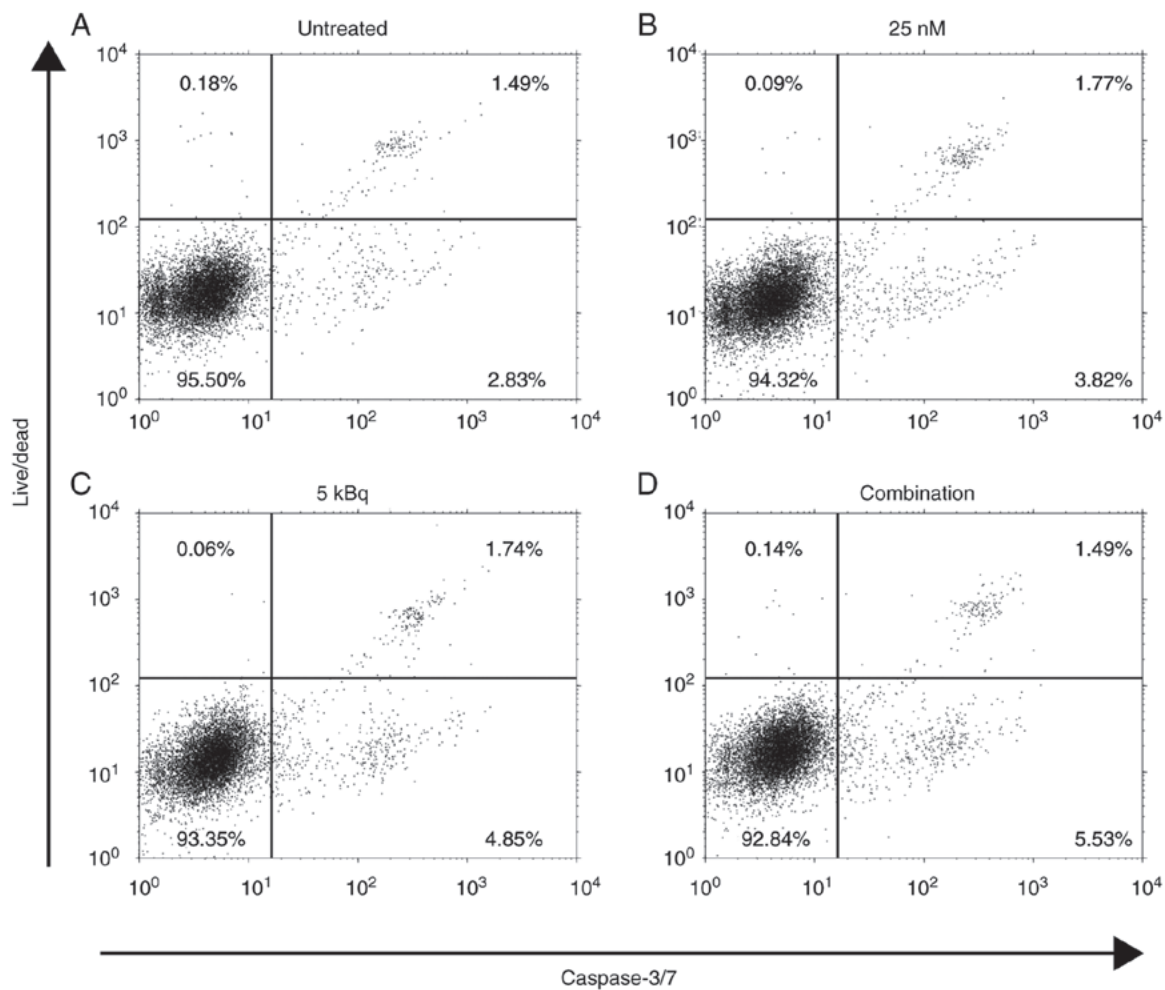

Supplement: Supplementary_Data.pdf [file Supplementary_Data.pdf]
